# Supplementary material
Source: publisher figshare collection journal article supplement (https://rs.figshare.com/ndownloader/files/14558240)
Supplement: Supplementary file 1 [file 14558240]

Table S3 | GenBank accession numbers for all species in the CO1 phylogeny.

| **Species** | **GenBank Accession Number** | **Reference** |
| --- | --- | --- |
| *Ammobates punctatus* | HM401141 | Schmidt et al. 2015 |
| *Ammobatoides abdominalis* | KJ83805 | Schmidt et al. 2015 |
| *Andrena aberrans* | KJ837129 | Schmidt et al. 2015 |
| *Andrena agilissima* | KT960836 | Makkar et al. 2016 |
| *Andrena albofasciata* | KJ837459 | Schmidt et al. 2018 |
| *Andrena alfkenella* | HM401243 | Schmidt et al. 2015 |
| *Andrena allosa* | KJ837196 | Schmidt et al. 2015 |
| *Andrena alutacea* | KJ836974 | Schmidt et al. 2015 |
| *Andrena ampla* | KJ836817 | Schmidt et al. 2015 |
| *Andrena angustior* | JQ909640 | Magnacca and Brown 2012 |
| *Andrena apicata* | JQ909642 | Magnacca and Brown 2012 |
| *Andrena argentata* | KJ838106 | Schmidt et al. 2015 |
| *Andrena barbareae* | KT164628 | Tang et al. 2017 |
| *Andrena barbilabris* | KJ836669 | Schmidt et al. 2015 |
| *Andrena bicolor* | GU706056 | Schmidt et al. 2015 |
| *Andrena bimaculata* | KJ837393 | Schmidt et al. 2015 |
| *Andrena bucephala* | KJ839574 | Schmidt et al. 2015 |
| *Andrena carantonica* | KT074022 | Schmidt et al. 2015 |
| *Andrena chrysopus* | GU705927 | Schmidt et al. 2015 |
| *Andrena chrysopyga* | HM376233 | Schmidt et al. 2015 |
| *Andrena chrysosceles* | HQ954749 | Schmidt et al. 2015 |
| *Andrena cineraria* | JQ909656 | Magnacca and Brown 2012 |
| *Andrena clarkella* | GU705928 | Schmidt et al. 2015 |
| *Andrena coitana* | KJ836599 | Schmidt et al. 2015 |
| *Andrena combinata* | KJ837482 | Schmidt et al. 2015 |
| *Andrena confinis* | HM401263 | Schmidt et al. 2015 |
| *Andrena congruens* | GU705940 | Schmidt et al. 2015 |
| *Andrena curtula* | KJ837178 | Schmidt et al. 2015 |
| *Andrena curvungula* | KJ837652 | Schmidt et al. 2015 |
| *Andrena decipiens* | KJ837637 | Schmidt et al. 2015 |
| *Andrena denticulata* | GU705953 | Schmidt et al. 2015 |
| *Andrena distinguenda* | KJ839472 | Schmidt et al. 2015 |
| *Andrena dorsata* | KJ837258 | Schmidt et al. 2015 |
| *Andrena enslinella* | KJ838020 | Schmidt et al. 2015 |
| *Andrena falsifica* | KJ838103 | Schmidt et al. 2015 |
| *Andrena ferox* | KJ839323 | Schmidt et al. 2015 |
| *Andrena flavipes* | KJ839275 | Schmidt et al. 2015 |
| *Andrena florea* | HM376235 | Schmidt et al. 2015 |
| *Andrena floricola* | KJ837140 | Schmidt et al. 2015 |
| *Andrena florivaga* | KJ837219 | Schmidt et al. 2015 |
| *Andrena fucata* | JQ909669 | Magnacca and Brown 2012 |
| *Andrena fulva* | GU705958 | Schmidt et al. 2015 |
| *Andrena fulvago* | KJ837292 | Schmidt et al. 2015 |
| *Andrena fulvata* | HM401059 | Schmidt et al. 2015 |
| *Andrena fulvicornis* | HM376237 | Schmidt et al. 2015 |
| *Andrena fulvida* | HM401047 | Schmidt et al. 2015 |
| *Andrena fuscipes* | HM401055 | Schmidt et al. 2015 |
| *Andrena granulosa* | HQ954767 | Schmidt et al. 2015 |
| *Andrena gravida* | KJ836450 | Schmidt et al. 2015 |
| *Andrena haemorrhoa* | KJ839483 | Schmidt et al. 2015 |
| *Andrena hattorfiana* | KJ837424 | Schmidt et al. 2015 |
| *Andrena helvola* | KJ837363 | Schmidt et al. 2015 |
| *Andrena humilis* | KJ838908 | Schmidt et al. 2015 |
| *Andrena hypopolia* | HM376239 | Schmidt et al. 2015 |
| *Andrena intermedia* | KJ836983 | Schmidt et al. 2015 |
| *Andrena labialis* | HM376240 | Schmidt et al. 2015 |
| *Andrena labiata* | HM401048 | Schmidt et al. 2015 |
| *Andrena lagopus* | HM376241 | Schmidt et al. 2015 |
| *Andrena lapponica* | KJ837558 | Schmidt et al. 2015 |
| *Andrena lathyri* | KJ839310 | Schmidt et al. 2015 |
| *Andrena limata* | KJ837654 | Schmidt et al. 2015 |
| *Andrena marginata* | KJ837896 | Schmidt et al. 2015 |
| *Andrena minutula* | KJ836685 | Schmidt et al. 2015 |
| *Andrena minutuloides* | HM401044 | Schmidt et al. 2015 |
| *Andrena mitis* | KJ838697 | Schmidt et al. 2015 |
| *Andrena montana* | GU705960 | Schmidt et al. 2015 |
| *Andrena morio* | HM376243 | Schmidt et al. 2015 |
| *Andrena nana* | KJ839631 | Schmidt et al. 2015 |
| *Andrena nasuta* | KJ839710 | Schmidt et al. 2015 |
| *Andrena nigroaenea* | KJ836732 | Schmidt et al. 2015 |
| *Andrena nigrospina* | KJ838255 | Schmidt et al. 2015 |
| *Andrena nitida* | KT074020 | Schmidt et al. 2015 |
| *Andrena nitidiuscula* | KJ838927 | Schmidt et al. 2015 |
| *Andrena nitidula* | KJ836688 | Schmidt et al. 2015 |
| *Andrena niveata* | KJ836650 | Schmidt et al. 2015 |
| *Andrena nuptialis* | KJ837325 | Schmidt et al. 2015 |
| *Andrena nycthemera* | KJ836417 | Schmidt et al. 2015 |
| *Andrena ovatula* | KJ838397 | Schmidt et al. 2015 |
| *Andrena pallitarsis* | HM401021 | Schmidt et al. 2015 |
| *Andrena pandellei* | KJ839079 | Schmidt et al. 2015 |
| *Andrena pastellensis* | HM401027 | Schmidt et al. 2015 |
| *Andrena paucisquama* | KJ839316 | Schmidt et al. 2015 |
| *Andrena pilipes* | KJ836606 | Schmidt et al. 2015 |
| *Andrena polita* | HM401023 | Schmidt et al. 2015 |
| *Andrena potentillae* | HM401024 | Schmidt et al. 2015 |
| *Andrena praecox* | HM376224 | Schmidt et al. 2015 |
| *Andrena proxima* | HM401052 | Schmidt et al. 2015 |
| *Andrena pusilla* | KJ839537 | Schmidt et al. 2015 |
| *Andrena rhenana* | KJ838999 | Schmidt et al. 2015 |
| *Andrena rogenhoferi* | KJ838541 | Schmidt et al. 2015 |
| *Andrena rosae* | EU374644 | Schmidt et al. 2015 |
| *Andrena ruficrus* | HM401042 | Schmidt et al. 2015 |
| *Andrena rufizona* | KJ836804 | Schmidt et al. 2015 |
| *Andrena rufula* | KJ838498 | Schmidt et al. 2015 |
| *Andrena semilaevis* | KJ839157 | Schmidt et al. 2015 |
| *Andrena sericata* | KJ836715 | Schmidt et al. 2015 |
| *Andrena similis* | KJ839751 | Schmidt et al. 2015 |
| *Andrena spinigera* | KJ837406 | Schmidt et al. 2015 |
| *Andrena stragulata* | KJ839175 | Schmidt et al. 2015 |
| *Andrena strohmella* | KJ839737 | Schmidt et al. 2015 |
| *Andrena subopaca* | KJ836638 | Schmidt et al. 2015 |
| *Andrena suerinensis* | KJ838205 | Schmidt et al. 2015 |
| *Andrena susterai* | KJ838537 | Schmidt et al. 2015 |
| *Andrena symphyti* | KJ837432 | Schmidt et al. 2015 |
| *Andrena synadelpha* | KT074024 | Tang et al. 2017 |
| *Andrena taraxaci* | KJ839582 | Schmidt et al. 2015 |
| *Andrena tarsata* | JQ909697 | Magnacca and Brown 2012 |
| *Andrena thoracica* | KJ839789 | Schmidt et al. 2015 |
| *Andrena tibialis* | KJ837901 | Schmidt et al. 2015 |
| *Andrena trimmerana* | KJ836680 | Schmidt et al. 2015 |
| *Andrena tscheki* | KJ836443 | Schmidt et al. 2015 |
| *Andrena vaga* | KJ837581 | Schmidt et al. 2015 |
| *Andrena ventralis* | KJ839138 | Schmidt et al. 2015 |
| *Andrena viridescens* | KJ836441 | Schmidt et al. 2015 |
| *Andrena wilkella* | KJ836402 | Schmidt et al. 2015 |
| *Anthidiellum strigatum* | KJ837946 | Schmidt et al. 2015 |
| *Anthidium florentinum* | KJ839553 | Schmidt et al. 2015 |
| *Anthidium loti* | KJ836898 | Schmidt et al. 2015 |
| *Anthidium manicatum* | KJ838277 | Schmidt et al. 2015 |
| *Anthidium montanum* | KJ837682 | Schmidt et al. 2015 |
| *Anthidium oblongatum* | GU706008 | Schmidt et al. 2015 |
| *Anthidium punctatum* | GU706009 | Schmidt et al. 2015 |
| *Anthophora aestivalis* | HM376217 | Schmidt et al. 2015 |
| *Anthophora balneorum* | KJ839342 | Schmidt et al. 2015 |
| *Anthophora bimaculata* | KJ837025 | Schmidt et al. 2015 |
| *Anthophora furcata* | KJ837165 | Schmidt et al. 2015 |
| *Anthophora plagiata* | KJ839757 | Schmidt et al. 2015 |
| *Anthophora plumipes* | HM376219 | Schmidt et al. 2015 |
| *Anthophora pubescens* | KJ836626 | Schmidt et al. 2015 |
| *Anthophora quadrimaculata* | KJ839773 | Schmidt et al. 2015 |
| *Anthophora retusa* | KJ837816 | Schmidt et al. 2015 |
| *Apis mellifera* | MG443154 | Dewaard, BIOUG  Archive GGBN Data Release |
| *Biastes emarginatus* | KJ839184 | Schmidt et al. 2015 |
| *Biastes truncatus* | KJ837962 | Schmidt et al. 2015 |
| *Bombus alpinus* | HQ948121 | Schmidt et al. 2015 |
| *Bombus argillaceus* | KJ837978 | Schmidt et al. 2015 |
| *Bombus barbutellus* | GU705885 | Schmidt et al. 2015 |
| *Bombus bohemicus* | GU705896 | Schmidt et al. 2015 |
| *Bombus campestris* | GU705893 | Schmidt et al. 2015 |
| *Bombus confusus* | KJ836795 | Schmidt et al. 2015 |
| *Bombus cryptarum* | JQ843394 | williams et al. 2013 |
| *Bombus distinguendus* | KJ837828 | Schmidt et al. 2015 |
| *Bombus flavidus* | AY181184 | Pedersen 2002 |
| *Bombus gerstaeckeri* | GU705902 | Schmidt et al. 2015 |
| *Bombus hortorum* | KT164676 | Tang et al. 2017 |
| *Bombus humilis* | KJ836557 | Schmidt et al. 2015 |
| *Bombus hypnorum* | KT074031 | Tang et al. 2017 |
| *Bombus jonellus* | KJ837105 | Schmidt et al. 2015 |
| *Bombus lapidarius* | GU705907 | Schmidt et al. 2015 |
| *Bombus lucorum* | KT164681 | Tang et al. 2017 |
| *Bombus magnus* | GU705915 | Schmidt et al. 2015 |
| *Bombus mendax* | HQ563801 | Schmidt et al. 2015 |
| *Bombus mesomelas* | HQ563803 | Schmidt et al. 2015 |
| *Bombus monticola* | GU705913 | Schmidt et al. 2015 |
| *Bombus mucidus* | KJ839017 | Schmidt et al. 2015 |
| *Bombus muscorum* | KJ838500 | Schmidt et al. 2015 |
| *Bombus norvegicus* | GU705916 | Schmidt et al. 2015 |
| *Bombus pascuorum* | KJ836788 | Schmidt et al. 2015 |
| *Bombus pratorum* | KT164684 | Schmidt et al. 2015 |
| *Bombus pyrenaeus* | KJ837876 | Schmidt et al. 2015 |
| *Bombus quadricolor* | HQ563807 | Schmidt et al. 2015 |
| *Bombus ruderarius* | GU705935 | Schmidt et al. 2015 |
| *Bombus ruderatus* | KX821204 | Packer and Ruz 2016 |
| *Bombus rupestris* | GU705932 | Schmidt et al. 2015 |
| *Bombus semenoviellus* | HQ563810 | Schmidt et al. 2015 |
| *Bombus sichelii* | HQ563811 | Schmidt et al. 2015 |
| *Bombus soroeensis* | GU705936 | Schmidt et al. 2015 |
| *Bombus subterraneus* | KJ837619 | Schmidt et al. 2015 |
| *Bombus sylvarum* | GU705942 | Schmidt et al. 2015 |
| *Bombus sylvestris* | GU705886 | Schmidt et al. 2015 |
| *Bombus terrestris* | JQ843625 | Tang et al. 2017 |
| *Bombus vestalis* | GU705952 | Schmidt et al. 2015 |
| *Bombus veteranus* | HQ563800 | Schmidt et al. 2015 |
| *Bombus wurflenii* | GU705917 | Schmidt et al. 2015 |
| *Camptopoeum frontale* | KJ837986 | Schmidt et al. 2015 |
| *Ceratina chalybea* | KJ836933 | Schmidt et al. 2015 |
| *Ceratina cucurbitina* | KJ836657 | Schmidt et al. 2015 |
| *Ceratina cyanea* | GU705965 | Schmidt et al. 2015 |
| *Ceratina nigrolabiata* | KJ836469 | Schmidt et al. 2015 |
| *Chelostoma campanularum* | KR792705 | Schmidt et al. 2015 |
| *Chelostoma distinctum* | KJ837112 | Schmidt et al. 2015 |
| *Chelostoma emarginatum* | KJ837355 | Schmidt et al. 2015 |
| *Chelostoma grande* | KJ836477 | Schmidt et al. 2015 |
| *Chelostoma rapunculi* | KR783170 | Schmidt et al. 2015 |
| *Coelioxys afra* | KJ837838 | Schmidt et al. 2015 |
| *Coelioxys alatav* | HM401246 | Schmidt et al. 2015 |
| *Coelioxys argentea* | KJ837998 | Schmidt et al. 2015 |
| *Coelioxys aurolimbata* | KJ838074 | Schmidt et al. 2015 |
| *Coelioxys brevis* | KJ837761 | Schmidt et al. 2015 |
| *Coelioxys conica* | HM401145 | Schmidt et al. 2015 |
| *Coelioxys conoidea* | KJ839589 | Schmidt et al. 2015 |
| *Coelioxys echinata* | HM401148 | Schmidt et al. 2015 |
| *Coelioxys elongata* | KJ837365 | Schmidt et al. 2015 |
| *Coelioxys haemorrhoa* | KJ839282 | Schmidt et al. 2015 |
| *Coelioxys inermis* | KJ839147 | Schmidt et al. 2015 |
| *Coelioxys mandibularis* | KJ839664 | Schmidt et al. 2015 |
| *Coelioxys rufescens* | KJ837496 | Schmidt et al. 2015 |
| *Colletes brevigena* | KJ839788 | Schmidt et al. 2015 |
| *Colletes collaris* | DQ085544 | Kuhlmann et al. 2007 |
| *Colletes cunicularius* | KJ837588 | Schmidt et al. 2015 |
| *Colletes daviesanus* | KJ837050 | Schmidt et al. 2015 |
| *Colletes floralis* | HQ948116 | Schmidt et al. 2015 |
| *Colletes fodiens* | HM401156 | Schmidt et al. 2015 |
| *Colletes graeffei* | KJ839614 | Schmidt et al. 2015 |
| *Colletes halophilus* | DQ085542 | Kuhlmann et al. 2007 |
| *Colletes hederae* | KJ839205 | Schmidt et al. 2015 |
| *Colletes hylaeiformis* | KJ837953 | Schmidt et al. 2015 |
| *Colletes impunctatus* | HM401265 | Schmidt et al. 2015 |
| *Colletes marginatus* | KJ837247 | Schmidt et al. 2015 |
| *Colletes mlokossewiczi* | KJ837366 | Schmidt et al. 2015 |
| *Colletes nasutus* | HM401158 | Schmidt et al. 2015 |
| *Colletes similis* | KJ838772 | Schmidt et al. 2015 |
| *Colletes succinctus* | KJ837472 | Schmidt et al. 2015 |
| *Dasypoda argentata* | KJ839763 | Schmidt et al. 2015 |
| *Dasypoda hirtipes* | KT074042 | Schmidt et al. 2018 |
| *Dasypoda suripes* | KJ838502 | Schmidt et al. 2015 |
| *Dioxys cincta* | KJ836409 | Schmidt et al. 2015 |
| *Dioxys tridentata* | KJ837073 | Schmidt et al. 2015 |
| *Dufourea alpina* | KJ839615 | Schmidt et al. 2018 |
| *Dufourea dentiventris* | HM401151 | Schmidt et al. 2018 |
| *Dufourea halictula* | HM401152 | Schmidt et al. 2018 |
| *Dufourea inermis* | KJ837444 | Schmidt et al. 2018 |
| *Dufourea minuta* | KJ838873 | Schmidt et al. 2018 |
| *Dufourea paradoxa* | KJ839493 | Schmidt et al. 2018 |
| *Epeoloides coecutiens* | GU706014 | Schmidt et al. 2015 |
| *Epeolus alpinus* | KJ837447 | Schmidt et al. 2015 |
| *Epeolus cruciger* | KJ836474 | Schmidt et al. 2015 |
| *Epeolus marginatus* | KJ838052 | Schmidt et al. 2015 |
| *Epeolus schummeli* | KJ837959 | Schmidt et al. 2015 |
| *Epeolus variegatus* | HM401155 | Schmidt et al. 2015 |
| *Eucera chrysopyga* | KJ836791 | Schmidt et al. 2015 |
| *Eucera cineraria* | KJ836627 | Schmidt et al. 2015 |
| *Eucera interrupta* | KJ836504 | Schmidt et al. 2015 |
| *Eucera longicornis* | KJ838283 | Schmidt et al. 2015 |
| *Eucera nigrescens* | KJ838368 | Schmidt et al. 2015 |
| *Halictus cochlearitarsis* | KJ836651 | Schmidt et al. 2015 |
| *Halictus confusus* | KJ839065 | Schmidt et al. 2015 |
| *Halictus eurygnathus* | KJ839238 | Schmidt et al. 2015 |
| *Halictus gavarnicus* | KJ839088 | Schmidt et al. 2015 |
| *Halictus langobardicus* | HM401091 | Schmidt et al. 2015 |
| *Halictus leucaheneus* | KJ838382 | Schmidt et al. 2015 |
| *Halictus maculatus* | KJ836478 | Schmidt et al. 2015 |
| *Halictus pollinosus* | KJ838192 | Schmidt et al. 2015 |
| *Halictus quadricinctus* | KJ836586 | Schmidt et al. 2018 |
| *Halictus rubicundus* | KJ837973 | Schmidt et al. 2015 |
| *Halictus scabiosae* | KJ839219 | Schmidt et al. 2015 |
| *Halictus sexcinctus* | KJ838845 | Schmidt et al. 2015 |
| *Halictus simplex* | KJ836612 | Schmidt et al. 2015 |
| *Halictus smaragdulus* | KJ837345 | Schmidt et al. 2018 |
| *Halictus subauratus* | KJ836879 | Schmidt et al. 2018 |
| *Halictus tumulorum* | KJ836913 | Schmidt et al. 2015 |
| *Heriades crenulatus* | KJ836538 | Schmidt et al. 2015 |
| *Heriades truncorum* | KJ836448 | Schmidt et al. 2015 |
| *Hoplitis acuticornis* | HM401195 | Schmidt et al. 2015 |
| *Hoplitis adunca* | HM401196 | Schmidt et al. 2015 |
| *Hoplitis anthocopoides* | KJ838067 | Schmidt et al. 2015 |
| *Hoplitis claviventris* | KJ837591 | Schmidt et al. 2015 |
| *Hoplitis lepeletieri* | KJ837451 | Schmidt et al. 2015 |
| *Hoplitis leucomelana* | HM401205 | Schmidt et al. 2015 |
| *Hoplitis loti* | HM401209 | Schmidt et al. 2015 |
| *Hoplitis mitis* | KJ838545 | Schmidt et al. 2015 |
| *Hoplitis mucida* | KJ837173 | Schmidt et al. 2015 |
| *Hoplitis papaveris* | KJ836470 | Schmidt et al. 2015 |
| *Hoplitis ravouxi* | KJ839378 | Schmidt et al. 2015 |
| *Hoplitis tridentata* | GU705987 | Schmidt et al. 2015 |
| *Hoplitis tuberculata* | HQ948088 | Schmidt et al. 2015 |
| *Hoplitis villosa* | HM401232 | Schmidt et al. 2015 |
| *Hylaeus alpinus* | HM401162 | Schmidt et al. 2015 |
| *Hylaeus angustatus* | KJ836545 | Schmidt et al. 2015 |
| *Hylaeus annulatus* | KJ839556 | Schmidt et al. 2015 |
| *Hylaeus brevicornis* | KJ839278 | Schmidt et al. 2015 |
| *Hylaeus clypearis* | HM401165 | Schmidt et al. 2015 |
| *Hylaeus communis* | KJ839696 | Schmidt et al. 2015 |
| *Hylaeus confusus* | GU705974 | Schmidt et al. 2015 |
| *Hylaeus cornutus* | KJ839471 | Schmidt et al. 2015 |
| *Hylaeus difformis* | HM401166 | Schmidt et al. 2015 |
| *Hylaeus dilatatus* | KJ839192 | Schmidt et al. 2015 |
| *Hylaeus duckei* | HM401169 | Schmidt et al. 2015 |
| *Hylaeus gibbus* | KJ837435 | Schmidt et al. 2015 |
| *Hylaeus glacialis* | KJ838093 | Schmidt et al. 2015 |
| *Hylaeus gracilicornis* | HM401171 | Schmidt et al. 2015 |
| *Hylaeus gredleri* | KJ837308 | Schmidt et al. 2015 |
| *Hylaeus hyalinatus* | KJ837179 | Schmidt et al. 2015 |
| *Hylaeus incongruus* | KJ837097 | Schmidt et al. 2015 |
| *Hylaeus intermedius* | KJ838687 | Schmidt et al. 2015 |
| *Hylaeus kahri* | KJ838978 | Schmidt et al. 2015 |
| *Hylaeus leptocephalus* | KJ838113 | Schmidt et al. 2015 |
| *Hylaeus lineolatus* | HM401173 | Schmidt et al. 2015 |
| *Hylaeus moricei* | HM401175 | Schmidt et al. 2015 |
| *Hylaeus nigritus* | KJ838096 | Schmidt et al. 2015 |
| *Hylaeus nivalis* | HM401179 | Schmidt et al. 2015 |
| *Hylaeus paulus* | KJ837780 | Schmidt et al. 2015 |
| *Hylaeus pectoralis* | KJ839242 | Schmidt et al. 2015 |
| *Hylaeus pfankuchi* | HM401182 | Schmidt et al. 2015 |
| *Hylaeus pictipes* | KJ838603 | Schmidt et al. 2015 |
| *Hylaeus pilosulus* | HQ948063 | Schmidt et al. 2015 |
| *Hylaeus punctatus* | KJ839293 | Schmidt et al. 2015 |
| *Hylaeus punctulatissimus* | HM401185 | Schmidt et al. 2015 |
| *Hylaeus rinki* | GU705973 | Schmidt et al. 2015 |
| *Hylaeus signatus* | KJ836815 | Schmidt et al. 2015 |
| *Hylaeus sinuatus* | KJ838509 | Schmidt et al. 2015 |
| *Hylaeus styriacus* | KJ837075 | Schmidt et al. 2015 |
| *Hylaeus tyrolensis* | KJ836565 | Schmidt et al. 2015 |
| *Hylaeus variegatus* | HM401187 | Schmidt et al. 2015 |
| *Lasioglossum aeratum* | KJ837299 | Schmidt et al. 2015 |
| *Lasioglossum albipes* | KJ838990 | Schmidt et al. 2018 |
| *Lasioglossum albocinctum* | KJ838953 | Schmidt et al. 2018 |
| *Lasioglossum alpigenum* | KJ837857 | Schmidt et al. 2015 |
| *Lasioglossum angusticeps* | HQ948051 | Schmidt et al. 2015 |
| *Lasioglossum bavaricum* | KJ838236 | Schmidt et al. 2015 |
| *Lasioglossum bluethgeni* | HM401099 | Schmidt et al. 2015 |
| *Lasioglossum brevicorne* | HQ948053 | Schmidt et al. 2015 |
| *Lasioglossum breviventre* | KJ836700 | Schmidt et al. 2018 |
| *Lasioglossum calceatum* | KT074051 | Schmidt et al. 2018 |
| *Lasioglossum clypeare* | KJ837961 | Schmidt et al. 2015 |
| *Lasioglossum convexiusculum* | KJ837411 | Schmidt et al. 2015 |
| *Lasioglossum costulatum* | KJ836497 | Schmidt et al. 2015 |
| *Lasioglossum cupromicans* | KJ837001 | Schmidt et al. 2015 |
| *Lasioglossum discum* | KJ839117 | Schmidt et al. 2018 |
| *Lasioglossum euboeense* | KJ838441 | Schmidt et al. 2018 |
| *Lasioglossum fratellum* | HQ954751 | Schmidt et al. 2015 |
| *Lasioglossum fulvicorne* | KJ838123 | Schmidt et al. 2015 |
| *Lasioglossum glabriusculum* | KJ836659 | Schmidt et al. 2015 |
| *Lasioglossum griseolum* | KJ838447 | Schmidt et al. 2015 |
| *Lasioglossum intermedium* | KJ838212 | Schmidt et al. 2015 |
| *Lasioglossum interruptum* | KJ839609 | Schmidt et al. 2018 |
| *Lasioglossum laevigatum* | HQ954752 | Schmidt et al. 2018 |
| *Lasioglossum laticeps* | KJ837829 | Schmidt et al. 2018 |
| *Lasioglossum lativentre* | KJ837839 | Schmidt et al. 2015 |
| *Lasioglossum leucopus* | KJ839703 | Schmidt et al. 2015 |
| *Lasioglossum leucozonium* | KT074054 | Schmidt et al. 2018 |
| *Lasioglossum limbellum* | KJ839645 | Schmidt et al. 2015 |
| *Lasioglossum lineare* | KJ837027 | Schmidt et al. 2018 |
| *Lasioglossum lissonotum* | KJ839702 | Schmidt et al. 2015 |
| *Lasioglossum lucidulum* | KJ836604 | Schmidt et al. 2015 |
| *Lasioglossum majus* | KJ839149 | Schmidt et al. 2018 |
| *Lasioglossum malachurum* | GU706051 | Schmidt et al. 2018 |
| *Lasioglossum marginatum* | HM401258 | Schmidt et al. 2018 |
| *Lasioglossum marginellum* | KJ838806 | Schmidt et al. 2015 |
| *Lasioglossum minutissimum* | KJ837045 | Schmidt et al. 2015 |
| *Lasioglossum minutulum* | KJ838016 | Schmidt et al. 2015 |
| *Lasioglossum morio* | GU706057 | Schmidt et al. 2015 |
| *Lasioglossum nigripes* | HM401251 | Schmidt et al. 2018 |
| *Lasioglossum nitidiusculum* | KT074055 | Tang et al. 2017 |
| *Lasioglossum nitidulum* | KJ837376 | Schmidt et al. 2015 |
| *Lasioglossum pallens* | KJ839719 | Schmidt et al. 2015 |
| *Lasioglossum parvulum* | HM376230 | Schmidt et al. 2015 |
| *Lasioglossum pauperatum* | HQ948112 | Schmidt et al. 2015 |
| *Lasioglossum pauxillum* | KT164647 | Tang et al. 2017 |
| *Lasioglossum pleurospeculum* | HQ948114 | Schmidt et al. 2015 |
| *Lasioglossum politum* | KJ838762 | Schmidt et al. 2015 |
| *Lasioglossum punctatissimum* | HM376229 | Schmidt et al. 2015 |
| *Lasioglossum puncticolle* | HM401255 | Schmidt et al. 2015 |
| *Lasioglossum pygmaeum* | KJ836931 | Schmidt et al. 2015 |
| *Lasioglossum quadrinotatulum* | KJ839622 | Schmidt et al. 2015 |
| *Lasioglossum quadrinotatum* | KX374818 | unpublished |
| *Lasioglossum rufitarse* | JN272460 | Schmidt et al. 2015 |
| *Lasioglossum sabulosum* | KJ838136 | Schmidt et al. 2015 |
| *Lasioglossum semilucens* | KJ837659 | Schmidt et al. 2015 |
| *Lasioglossum setulosum* | KJ837830 | Schmidt et al. 2015 |
| *Lasioglossum sexmaculatum* | KJ839463 | Schmidt et al. 2015 |
| *Lasioglossum sexnotatum* | KJ838091 | Schmidt et al. 2015 |
| *Lasioglossum sexstrigatum* | HQ954761 | Schmidt et al. 2015 |
| *Lasioglossum smeathmanellum* | KT074061 | Tang et al. 2017 |
| *Lasioglossum subfasciatum* | KJ839824 | Schmidt et al. 2015 |
| *Lasioglossum subfulvicorne* | HQ948016 | Schmidt et al. 2015 |
| *Lasioglossum tricinctum* | KJ838157 | Schmidt et al. 2015 |
| *Lasioglossum villosulum* | GU705888 | Schmidt et al. 2015 |
| *Lasioglossum virens* | KJ839379 | Schmidt et al. 2015 |
| *Lasioglossum xanthopus* | KJ836625 | Schmidt et al. 2015 |
| *Lasioglossum zonulum* | KJ838322 | Schmidt et al. 2018 |
| *Lithurgus chrysurus* | KJ836731 | Schmidt et al. 2015 |
| *Macropis europaea* | GU706049 | Schmidt et al. 2018 |
| *Macropis fulvipes* | KJ838021 | Schmidt et al. 2018 |
| *Megachile albisecta* | KJ839743 | Schmidt et al. 2015 |
| *Megachile alpicola* | KJ838895 | Schmidt et al. 2015 |
| *Megachile analis* | M401190 | Schmidt et al. 2015 |
| *Megachile apicalis* | [KJ837288](https://www.ncbi.nlm.nih.gov/nucleotide/KJ837288.1?report=genbank&log$=nucltop&blast_rank=1&RID=SDGA0K6T01R) | Schmidt et al. 2015 |
| *Megachile centuncularis* | HM401192 | Schmidt et al. 2015 |
| *Megachile circumcincta* | GU705984 | Schmidt et al. 2015 |
| *Megachile deceptoria* | KJ836416 | Schmidt et al. 2018 |
| *Megachile ericetorum* | GU705988 | Schmidt et al. 2015 |
| *Megachile flabellipes* | KJ836765 | schmidt et al. 2015 |
| *Megachile genalis* | HM401106 | Schmidt et al. 2015 |
| *Megachile lagopoda* | HM401107 | Schmidt et al. 2015 |
| *Megachile lapponica* | HQ948055 | Schmidt et al. 2015 |
| *Megachile leachella* | HM401112 | schmidt et al. 2015 |
| *Megachile ligniseca* | GU705995 | Schmidt et al. 2015 |
| *Megachile maritima* | HM401117 | Schmidt et al. 2015 |
| *Megachile melanopyga* | HM401121 | Schmidt et al. 2015 |
| *Megachile nigriventris* | GU705992 | Schmidt et al. 2015 |
| *Megachile opacifrons* | KJ838937 | schmidt et al. 2015 |
| *Megachile parietina* | HM401125 | Schmidt et al. 2015 |
| *Megachile pilidens* | GU705996 | Schmidt et al. 2015 |
| *Megachile pyrenaea* | HM401130 | Schmidt et al. 2015 |
| *Megachile pyrenaica* | KJ838168 | Schmidt et al. 2015 |
| *Megachile rotundata* | GU706002 | schmidt et al. 2015 |
| *Megachile rufescens* | KJ838680 | Schmidt et al. 2015 |
| *Megachile versicolor* | KJ836926 | Schmidt et al. 2015 |
| *Megachile willughbiella* | GU706003 | Schmidt et al. 2015 |
| *Melecta albifrons* | KJ838618 | Schmidt et al. 2015 |
| *Melecta luctuosa* | KJ839507 | Schmidt et al. 2015 |
| *Melitta dimidiata* | KJ837102 | Schmidt et al. 2015 |
| *Melitta haemorrhoidalis* | GU706046 | Schmidt et al. 2015 |
| *Melitta leporina* | KJ837410 | Schmidt et al. 2015 |
| *Melitta nigricans* | KJ839607 | Schmidt et al. 2015 |
| *Melitta tricincta* | KJ838749 | Schmidt et al. 2015 |
| *Melitturga clavicornis* | KJ836607 | Schmidt et al. 2015 |
| *Nomada alboguttata* | KJ838522 | Schmidt et al. 2015 |
| *Nomada argentata* | KJ838360 | Schmidt et al. 2015 |
| *Nomada armata* | KJ836882 | Schmidt et al. 2015 |
| *Nomada atroscutellaris* | KJ838079 | Schmidt et al. 2015 |
| *Nomada bifasciata* | HM401039 | Schmidt et al. 2015 |
| *Nomada bluethgeni* | HQ948021 | Schmidt et al. 2015 |
| *Nomada castellana* | KJ837163 | Schmidt et al. 2015 |
| *Nomada conjungens* | KJ837916 | Schmidt et al. 2015 |
| *Nomada distinguenda* | KJ836592 | Schmidt et al. 2015 |
| *Nomada emarginata* | KJ836575 | Schmidt et al. 2015 |
| *Nomada fabriciana* | GU706016 | Schmidt et al. 2015 |
| *Nomada facilis* | HM401068 | Schmidt et al. 2015 |
| *Nomada femoralis* | HM401070 | Schmidt et al. 2015 |
| *Nomada ferruginata* | KJ836584 | Schmidt et al. 2015 |
| *Nomada flava* | GU706019 | Schmidt et al. 2015 |
| *Nomada flavoguttata* | KJ836513 | Schmidt et al. 2015 |
| *Nomada flavopicta* | HM401073 | Schmidt et al. 2015 |
| *Nomada fucata* | KT074069 | Schmidt et al. 2015 |
| *Nomada fulvicornis* | GU706024 | Schmidt et al. 2015 |
| *Nomada furva* | KJ837852 | Schmidt et al. 2015 |
| *Nomada fuscicornis* | HM401086 | Schmidt et al. 2015 |
| *Nomada glabella* | KJ837655 | Schmidt et al. 2015 |
| *Nomada goodeniana* | KT164660 | Zheng et al. 2018 |
| *Nomada guttulata* | HQ948030 | Schmidt et al. 2015 |
| *Nomada hirtipes* | GU706039 | Schmidt et al. 2015 |
| *Nomada integra* | KJ837492 | Schmidt et al. 2015 |
| *Nomada kohli* | HQ948035 | Schmidt et al. 2015 |
| *Nomada lathburiana* | KJ837412 | Schmidt et al. 2015 |
| *Nomada leucophthalma* | GU706027 | Schmidt et al. 2015 |
| *Nomada marshamella* | GU706032 | Schmidt et al. 2015 |
| *Nomada melathoracica* | HQ948037 | Schmidt et al. 2015 |
| *Nomada meridionalis* | KJ837880 | Schmidt et al. 2015 |
| *Nomada minuscula* | KJ837068 | Schmidt et al. 2015 |
| *Nomada moeschleri* | HM401079 | Schmidt et al. 2015 |
| *Nomada mutabilis* | KJ837610 | Schmidt et al. 2015 |
| *Nomada mutica* | KJ838713 | Schmidt et al. 2015 |
| *Nomada nobilis* | KJ836654 | Schmidt et al. 2015 |
| *Nomada obscura* | KJ837640 | Schmidt et al. 2015 |
| *Nomada obtusifrons* | KJ836639 | Schmidt et al. 2015 |
| *Nomada opaca* | HM401080 | Schmidt et al. 2015 |
| *Nomada panzeri* | KJ837799 | Schmidt et al. 2015 |
| *Nomada pleurosticta* | KJ836589 | Schmidt et al. 2015 |
| *Nomada posthuma* | KJ837409 | Schmidt et al. 2015 |
| *Nomada rhenana* | KJ838920 | Schmidt et al. 2015 |
| *Nomada roberjeotiana* | KJ837507 | Schmidt et al. 2015 |
| *Nomada rostrata* | KJ839808 | Schmidt et al. 2015 |
| *Nomada ruficornis* | KT164649 | Schmidt et al. 2015 |
| *Nomada rufipes* | KJ838388 | Schmidt et al. 2015 |
| *Nomada sexfasciata* | KJ837270 | Schmidt et al. 2015 |
| *Nomada sheppardana* | KJ83747 | Schmidt et al. 2015 |
| *Nomada signata* | HM401085 | Schmidt et al. 2015 |
| *Nomada similis* | HM401087 | Schmidt et al. 2015 |
| *Nomada stigma* | KJ837336 | Schmidt et al. 2015 |
| *Nomada striata* | KJ836473 | Schmidt et al. 2015 |
| *Nomada succincta* | GU706045 | Schmidt et al. 2015 |
| *Nomada symphyti* | KJ839448 | Schmidt et al. 2015 |
| *Nomada tormentillae* | HQ948039 | Schmidt et al. 2015 |
| *Nomada villosa* | KJ836467 | Schmidt et al. 2015 |
| *Nomada zonata* | HM401090 | Schmidt et al. 2015 |
| *Nomia diversipes* | KJ837536 | Schmidt et al. 2015 |
| *Nomioides facilis* | KJ838426 | Schmidt et al. 2015 |
| *Nomioides minutissimus* | KJ839479 | Schmidt et al. 2015 |
| *Osmia alticola* | KJ839450 | Schmidt et al. 2015 |
| *Osmia andrenoides* | HM401197 | Schmidt et al. 2015 |
| *Osmia aurulenta* | KJ837026 | Schmidt et al. 2015 |
| *Osmia bicolor* | KJ839576 | Schmidt et al. 2015 |
| *Osmia bicornis* | GU705983 | Schmidt et al. 2015 |
| *Osmia brevicornis* | HM401200 | Schmidt et al. 2015 |
| *Osmia caerulescens* | KT074074 | Tang et al. 2017 |
| *Osmia cerinthidis* | KC709832 | Haider et al. 2013 |
| *Osmia cornuta* | KJ836461 | Schmidt et al. 2015 |
| *Osmia gallarum* | KJ836777 | Schmidt et al. 2015 |
| *Osmia inermis* | HM401203 | Schmidt et al. 2015 |
| *Osmia latreillei* | KJ837570 | Schmidt et al. 2015 |
| *Osmia leaiana* | HM401204 | Schmidt et al. 2015 |
| *Osmia melanogaster* | HM401210 | Schmidt et al. 2015 |
| *Osmia mustelina* | KJ838242 | Schmidt et al. 2015 |
| *Osmia nigriventris* | KJ839628 | Schmidt et al. 2015 |
| *Osmia niveata* | KJ838274 | Schmidt et al. 2015 |
| *Osmia parietina* | HM401222 | Schmidt et al. 2015 |
| *Osmia pilicornis* | KJ839236 | Schmidt et al. 2015 |
| *Osmia rufohirta* | KJ836740 | Schmidt et al. 2015 |
| *Osmia saxicola* | KJ836508 | Schmidt et al. 2015 |
| *Osmia spinulosa* | HM376215 | Schmidt et al. 2015 |
| *Osmia submicans* | KJ836956 | Schmidt et al. 2015 |
| *Osmia uncinata* | HM401230 | Schmidt et al. 2015 |
| *Osmia versicolor* | KJ838819 | Schmidt et al. 2015 |
| *Osmia viridana* | KJ837269 | Schmidt et al. 2015 |
| *Osmia xanthomelana* | KJ836953 | Schmidt et al. 2015 |
| *Panurginus herzi* | KJ838943 | Schmidt et al. 2015 |
| *Panurginus montanus* | HQ948095 | Schmidt et al. 2015 |
| *Panurginus sericatus* | KJ837895 | Schmidt et al. 2015 |
| *Panurgus banksianus* | KJ837192 | Schmidt et al. 2015 |
| *Panurgus calcaratus* | GU705956 | Schmidt et al. 2015 |
| *Panurgus dentipes* | KJ836713 | Schmidt et al. 2015 |
| *Pseudoanthidium melanurum* | KJ838568 | Schmidt et al. 2015 |
| *Pseudoanthidium scapulare* | KJ836523 | Schmidt et al. 2015 |
| *Rhodanthidium caturigense* | KJ836719 | Schmidt et al. 2015 |
| *Rhodanthidium septemdentatum* | KJ838285 | Schmidt et al. 2015 |
| *Rophites algirus* | KJ839593 | Schmidt et al. 2015 |
| *Rophites quinquespinosus* | KJ839028 | Schmidt et al. 2015 |
| *Sphecodes albilabris* | GU705920 | Schmidt et al. 2018 |
| *Sphecodes alternatus* | KJ837938 | Schmidt et al. 2018 |
| *Sphecodes crassanus* | KJ838632 | Schmidt et al. 2018 |
| *Sphecodes crassus* | GU705945 | Schmidt et al. 2018 |
| *Sphecodes cristatus* | JX256667 | Habermannová et al. 2013 |
| *Sphecodes croaticus* | KJ836647 | Schmidt et al. 2018 |
| *Sphecodes ephippius* | KT074079 | Schmidt et al. 2018 |
| *Sphecodes ferruginatus* | KJ837622 | Schmidt et al. 2018 |
| *Sphecodes geoffrellus* | KJ837236 | Schmidt et al. 2018 |
| *Sphecodes gibbus* | KJ836803 | Schmidt et al. 2018 |
| *Sphecodes hyalinatus* | KJ837294 | Schmidt et al. 2018 |
| *Sphecodes longulus* | KJ836681 | Schmidt et al. 2018 |
| *Sphecodes majalis* | KJ837051 | Schmidt et al. 2018 |
| *Sphecodes marginatus* | KJ839540 | Schmidt et al. 2018 |
| *Sphecodes miniatus* | KJ836506 | Schmidt et al. 2018 |
| *Sphecodes niger* | KJ836693 | Schmidt et al. 2018 |
| *Sphecodes pellucidus* | KT074080 | Tang et al. 2017 |
| *Sphecodes puncticeps* | KT074081 | Schmidt et al. 2018 |
| *Sphecodes reticulatus* | KJ837577 | Schmidt et al. 2018 |
| *Sphecodes rubicundus* | HQ563095 | Schmidt et al. 2018 |
| *Sphecodes ruficrus* | KJ836476 | Schmidt et al. 2018 |
| *Sphecodes rufiventris* | KJ837280 | Schmidt et al. 2018 |
| *Sphecodes scabricollis* | KJ838552 | Schmidt et al. 2015 |
| *Sphecodes schenckii* | KJ836762 | Schmidt et al. 2018 |
| *Sphecodes spinulosus* | KJ839610 | Schmidt et al. 2015 |
| *Stelis breviuscula* | KJ838642 | Schmidt et al. 2015 |
| *Stelis franconica* | KJ838642 | Schmidt et al. 2015 |
| *Stelis minima* | HQ948107 | Schmidt et al. 2015 |
| *Stelis minuta* | KJ836896 | Schmidt et al. 2015 |
| *Stelis nasuta* | KJ839749 | Schmidt et al. 2015 |
| *Stelis odontopyga* | HM401240 | Schmidt et al. 2015 |
| *Stelis ornatula* | KJ836690 | Schmidt et al. 2015 |
| *Stelis punctulatissima* | HM401242 | Schmidt et al. 2015 |
| *Stelis signata* | KJ838629 | Schmidt et al. 2015 |
| *Systropha curvicornis* | KJ836819 | Schmidt et al. 2018 |
| *Systropha planidens* | KJ836726 | Schmidt et al. 2018 |
| *Tetralonia malvae* | KJ836698 | Schmidt et al. 2015 |
| *Tetraloniella dentata* | KJ836577 | Schmidt et al. 2015 |
| *Tetraloniella salicariae* | KJ836760 | Schmidt et al. 2015 |
| *Thyreus histrionicus* | HQ948099 | Schmidt et al. 2015 |
| *Thyreus orbatus* | HM401239 | Schmidt et al. 2015 |
| *Trachusa byssina* | KJ838247 | Schmidt et al. 2015 |
| *Xylocopa iris* | HM401103 | Schmidt et al. 2015 |
| *Xylocopa violacea* | KJ836969 | Schmidt et al. 2015 |

**References**

Dewaard, J.R. BIOUG Archive GGBN Data Release.

Habermannová, J., Bogusch, P., & Straka, J. (2013). Flexible host choice and common host switches in the evolution of generalist and specialist cuckoo bees (Anthophila: *Sphecodes*). PLoS One 8: e64537.

Haider, M., Dorn, S., Sedivy, C., & Müller, A. (2013). Phylogeny and floral hosts of a predominantly pollen generalist group of mason bees (Megachilidae: Osmiini). Biological Journal of the Linnean Society 111: 78-91.

Kuhlmann, M., Else, G. R., Dawson, A., & Quicke, D. L. (2007). Molecular, biogeographical and phenological evidence for the existence of three western European sibling species in the *Colletes succinctus* group (Hymenoptera: Apidae). Organisms Diversity & Evolution 7: 155-165.

Magnacca, K. N., & Brown, M. J. (2012). DNA barcoding a regional fauna: Irish solitary bees. Molecular Ecology Resources 12: 990-998.

Makkar, G. S., Dey, D., & Chhuneja, P. K. (2016). Mining bee *Andrena (Agandrena) agilissima* (Hymenoptera: Andrenidae): A new record from India with morphological and molecular notes. Journal of Applied and Natural Science 8: 1775-1778.

Packer, L., & Ruz, L. (2016). DNA barcoding the bees (Hymenoptera: Apoidea) of Chile: species discovery in a reasonably well-known bee fauna with the description of a new species of *Lonchopria* (Colletidae). Genome 60: 414-430.

Pedersen, V. (2002). European bumblebees (Hymenoptera: Bombini)-phylogenetic relationships inferred from DNA sequences. Insect Systematics & Evolution 33: 361-386.

Schmidt, S., Schmid‐Egger, C., Morinière, J., Haszprunar, G., & Hebert, P. D. (2015). DNA barcoding largely supports 250 years of classical taxonomy: identifications for Central European bees (Hymenoptera, Apoidea partim). Molecular Ecology Resources 15: 985-1000.

Tang, C.Q., Notton, D.G., Norman, H., & Vogler, A. P. (2017). Next generation pollinator identification using high throughput sequencing: Final summary report to the Department for Environment, Food and Rural Affairs (DEFRA): Project PH0521. The Natural History Museum and Defra. Pp 67.

Zheng, B.Y. et al. (2018). Gene arrangement and sequence of mitochondrial genomes yield insights into the phylogeny and evolution of bees and sphecid wasps (Hymenoptera: Apoidea). Molecular Phylogenetics and Evolution 124: 1-9.
